# Supplementary material for: Glyphosate Primes Mammary Cells for Tumorigenesis by Reprogramming the Epigenome in a TET3-Dependent Manner
Source: PubMed Central journal article supplement (PMC6777643; doi:10.3389/fgene.2019.00885), 2019-09-27
Supplement: DataSheet_3.pdf [file DataSheet_3.pdf]

# Glyphosate primes mammary cells for tumorigenesis by reprogramming the epigenome in a TET3-dependent manner.

Manon Duforestel<sup>1-2-3-4-5</sup>, Arulraj Nadaradjane<sup>1-2-3-4-5</sup>, Gwenola Bougras-Cartron<sup>1-2-3-4-5</sup>, Joséphine Briand<sup>1-2-3-4-5</sup>, Christophe Olivier<sup>1-2-6</sup>, Jean-Sébastien Frenel<sup>1-2-3-4-5</sup>, François M Vallette<sup>1-2-3-4-5</sup>, Sophie A. Lelièvre<sup>7,8</sup> and Pierre-François Cartron<sup>1-2-3-4-5</sup>

<sup>1</sup> CRCINA, INSERM, Université de Nantes, Nantes, France.

<sup>2</sup> Equipe Apoptose et Progression tumorale, LaBCT, Institut de Cancérologie de l'Ouest, Saint Herblain, France.

<sup>3</sup> Cancéropole Grand-Ouest, réseau Epigénétique (RepiCGO).

<sup>4</sup> EpiSAVMEN Consortium (Région Pays de la Loire).

<sup>5</sup> LabEX IGO, Université de Nantes, France.

<sup>6</sup> Service de toxicologie, Faculté de pharmacie de Nantes. Nantes, France

<sup>7</sup> Department of Basic Medical Sciences, Purdue University, West Lafayette, IN United States of America

<sup>8</sup> Purdue University Center for Cancer Research, West Lafayette, IN, United States of America

\* Correspondence: [pierre-francois.cartron@inserm.fr](mailto:pierre-francois.cartron@inserm.fr), CRCINA, INSERM U1232, Equipe Apoptose et Progression tumorale, LaBCT, Institut de Cancérologie de l'Ouest, Boulevard du Pr Jacques Monod, Saint Herblain, 44805, France.

**Running title:** Glyphosate-mediated breast cancer risk

**Keywords:** DNA methylation, TET, breast cancer, hypomethylation, epigenetic mark.

**Supplementary File 2: Kaplan-Meier illustrated the potential outcome of DUX4 expression in Breast cancer according to BC-GenExMiner and KM plotter website.**

BC-GenExMiner (<http://bcgenex.centregauducheau.fr>) is a statistical mining tool of published *annotated* breast cancer transcriptomic data (*DNA microarrays* [n = 10 012] and *RNA-seq* [n = 4 713]). Here, we have used BC-GenExMiner to draw the Kaplan-Meier curves for DUX4 in Breast cancer.

KM plotter website ([www.kmplot.com](http://www.kmplot.com)); In the meantime, please kindly cite our paper to support further development: Nagy Á, Lánczky A, Menyhárt O, Győrffy B: Validation of miRNA prognostic power in hepatocellular carcinoma using expression data of independent datasets, *Scientific Reports*, 2018;8:9277 | DOI:10.1038/s41598-018-27521-y) is a database having the ability to assess the effect of 54k genes on survival in a large number of cancer types (n=21). Here, we have used KM plotter to draw the Kaplan-Meier curves for DUX4 in Breast cancer.

**DUX4**  
**Kaplan-Meier survival estimates**

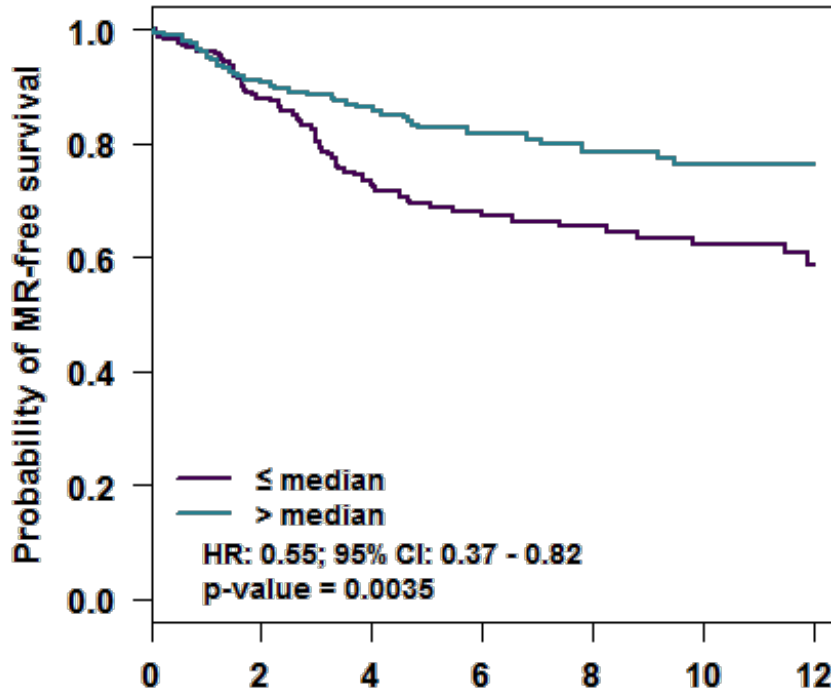

| Patients at risk: | Time (years) |     |     |    |    |    | (Events) |
|-------------------|--------------|-----|-----|----|----|----|----------|
|                   | 0            | 2   | 4   | 6  | 8  | 10 |          |
| — ≤ median        | 213          | 176 | 136 | 82 | 68 | 53 | 27 (70)  |
| — > median        | 210          | 173 | 151 | 85 | 71 | 60 | 22 (39)  |

# Kaplan- Meier Plotter

Breast Cancer

Breast Cancer

KM plotter

Home

Download

Updates

Contact

The desired is valid: 208201\_at (LOC653544),

**Affy ID:** 208201\_at LOC653544, LOC653545, DUX3, ...  
**Survival:** RFS  
**Split patients by:** median  
**Follow up threshold:** all  
**Censore at threshold:** checked  
**Compute median over entire database:** false  
**Cutoff value used in analysis:** 17  
**Expression range of the probe:** 1 - 667  
**Probe set option:** user selected probe set  
**Invert HR values below 1:** not checked

## Restrictions

ER status: all  
*derive ER status from gene expression data:* not checked  
 PR status: all  
 HER2 status: all  
 Intrinsic subtype: all  
 Lymph node status: all  
 Grade: all  
 TP53 status: all  
 Pietenpol subtype: all  
 Use earlier release of the database: all  
 Use following dataset for the analysis: all

## Quality control

Remove redundant samples: checked  
 Array quality control: exclude biased arrays  
 Proportional hazards assumption: 0

## Cohort

Cohorts: not selected

## Results

**P value:** 0.0166

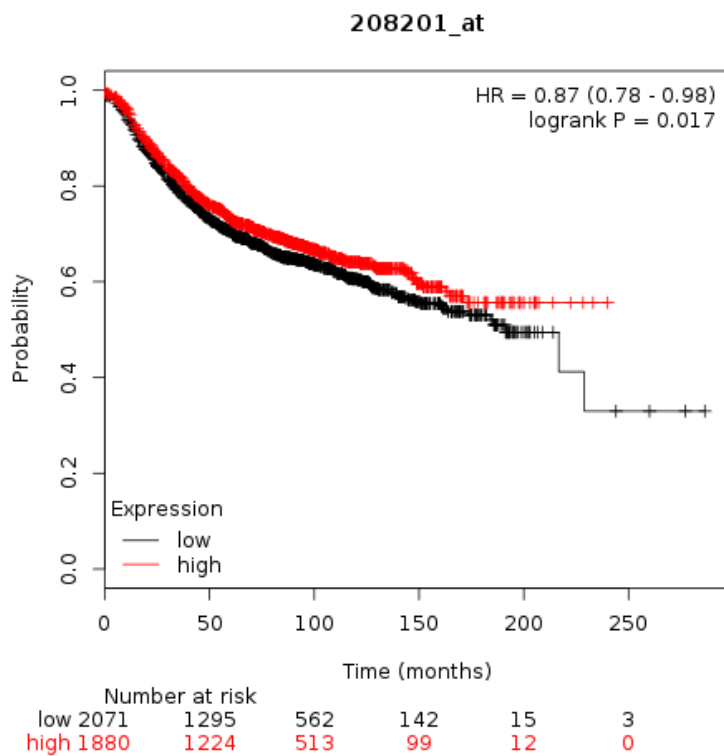

[Download plot as a PDF](#)

You can save the plots by right-clicking the image and then selecting "Save image as...". To generate a high resolution TIFF image, please adjust the "Settings" in the analysis page.
